# Supplementary material for: Overexpression of oHIOMT results in various morphological, anatomical, physiological and molecular changes in switchgrass
Source: Frontiers journal article supplement (doi:10.3389/fpls.2024.1379756), 2024-06-17
Supplement: Data_Sheet_1.PDF [file Data_Sheet_1.PDF]

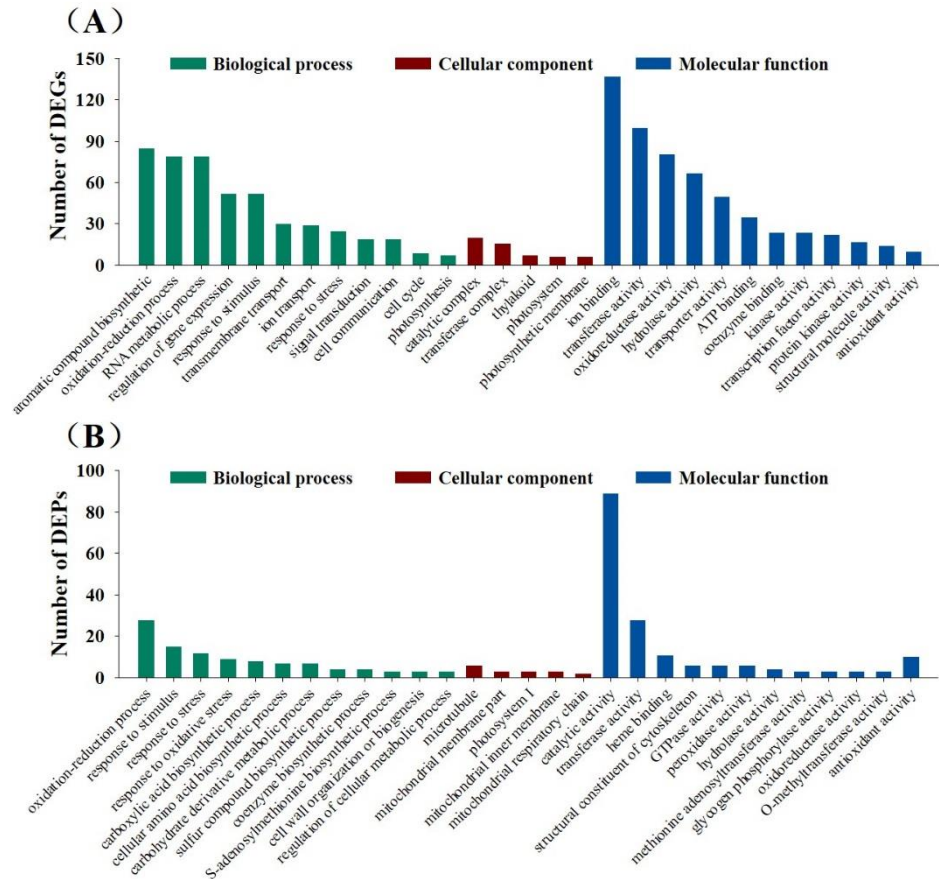

**Supplementary Figure 1.** GO classifications of DEGs (A) and DEPs (B) between MMT and MRT plants. MMT: melatonin-moderate transgenic switchgrass; MRT: melatonin-rich transgenic switchgrass; DEG: differentially expressed gene; DEP: differentially expressed protein.
