# Supplementary material for: Overexpression of oHIOMT results in various morphological, anatomical, physiological and molecular changes in switchgrass
Source: Frontiers journal article supplement (doi:10.3389/fpls.2024.1379756), 2024-06-17
Supplement: Data_Sheet_2.PDF [file Data_Sheet_2.PDF]

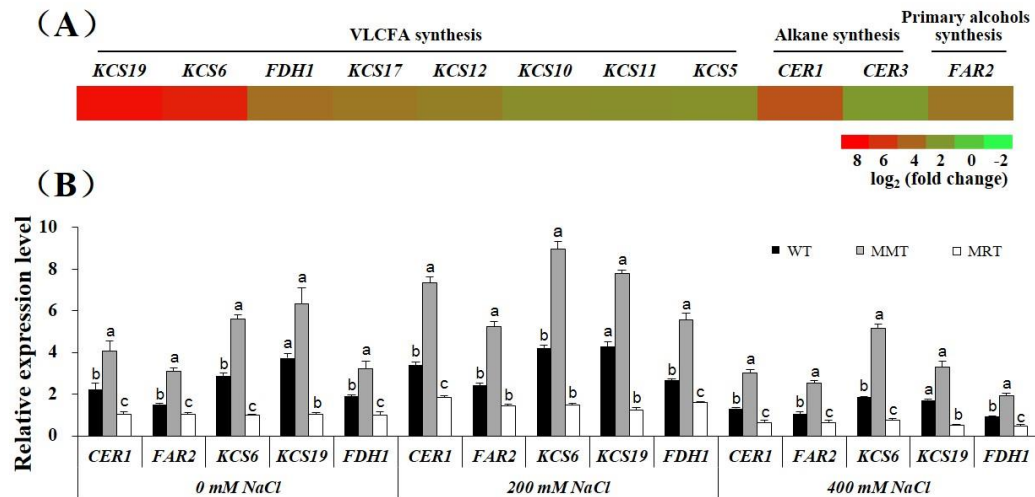

**Supplementary Figure 2.** Expression profiles of genes related to wax biosynthesis in MMT plants compared with MRT plants under normal (A) and salt stress conditions (B). WT: wild type; MMT: melatonin-moderate transgenic switchgrass; MRT: melatonin-rich transgenic switchgrass; Values are means  $\pm$  SE (n=3); Different letters above the bars indicate significant differences at  $p < 0.01$  (Duncan's test).
