# Supplementary material for: Overexpression of oHIOMT results in various morphological, anatomical, physiological and molecular changes in switchgrass
Source: Frontiers journal article supplement (doi:10.3389/fpls.2024.1379756), 2024-06-17
Supplement: Data_Sheet_3.PDF [file Data_Sheet_3.PDF]

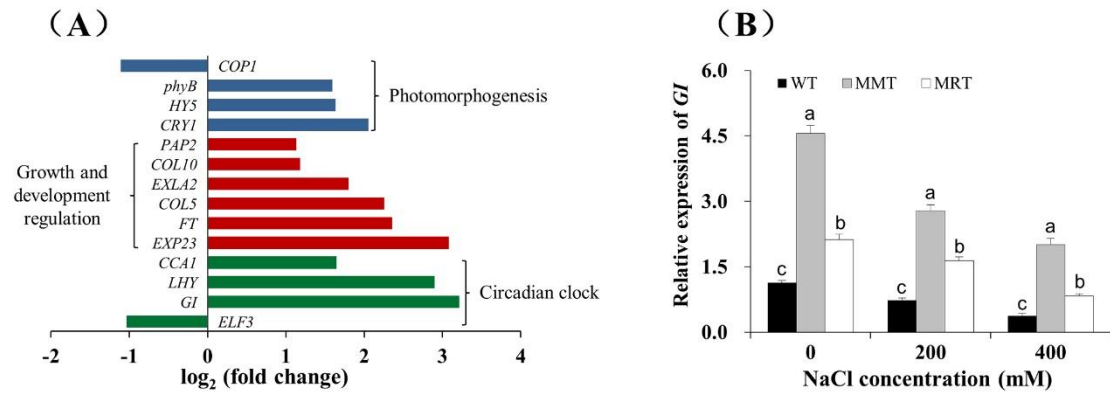

**Supplementary Figure 3.** Effects of melatonin on circadian rhythm. (A) DEGs involved in circadian rhythm-plant pathway in MMT plants compared with MRT plants. (B) Expression levels analysis of circadian clock output gene *GI* under salt stress. WT: wild type; MMT: melatonin-moderate transgenic switchgrass; MRT: melatonin-rich transgenic switchgrass; DEG: differentially expressed gene; Values are means  $\pm$  SE ( $n=3$ ); Different letters above the bars indicate significant differences at  $p < 0.01$  (Duncan's test).
